# Supplementary material for: Arrayed water-in-oil droplet bilayers for membrane transport analysis
Source: Royal Society of Chemistry journal article supplement (doi:10.1039/c6lc00155f), 2016-01-01
Supplement: c6lc00155f1.pdf [file c6lc00155f1.pdf]

## Supplementary Information

### Arrayed water-in-oil droplet bilayers for membrane transport analysis

Rikiya Watanabe <sup>a</sup>, Naoki Soga <sup>b</sup>, Mayu Hara <sup>b</sup>, & Hiroyuki Noji <sup>b</sup>

<sup>a</sup> Department of Applied Chemistry, The University of Tokyo; PRESTO, Japan Science and Technology Agency, 7-3-1 Hongo, Bunkyo-ku, Tokyo 113-8656, Japan

<sup>b</sup> Department of Applied Chemistry, The University of Tokyo, 7-3-1 Hongo, Bunkyo-ku, Tokyo 113-8656, Japan

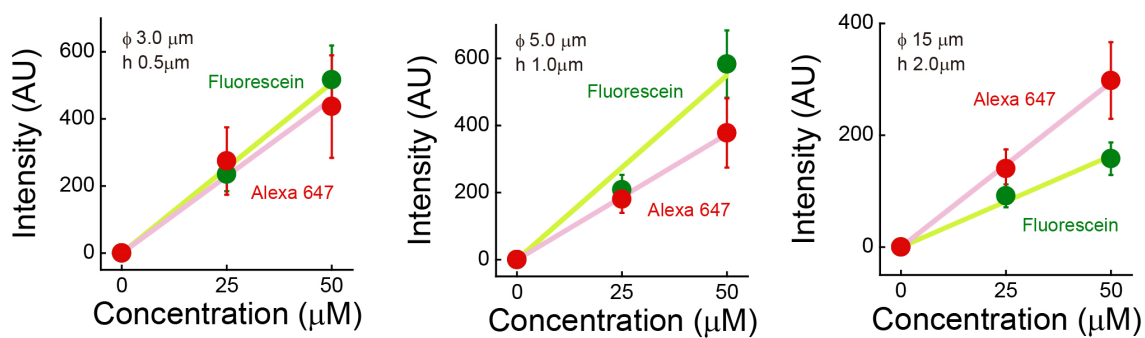

### Supplementary Fig. S1 Fluorescent intensity of Fluorescein and Alexa 647

Dependence of fluorescent intensity of Fluorescein (green) and Alexa 488 (red) on their concentration. Left, middle, and right panels represent the results using the micro-wells with 3.0- $\mu\text{m}$  diameter and 0.5- $\mu\text{m}$  height, 5.0- $\mu\text{m}$  diameter and 1.0- $\mu\text{m}$  height, and 15- $\mu\text{m}$  diameter, and 2.0- $\mu\text{m}$  height, respectively. The data were fitted with linear functions (solid lines).

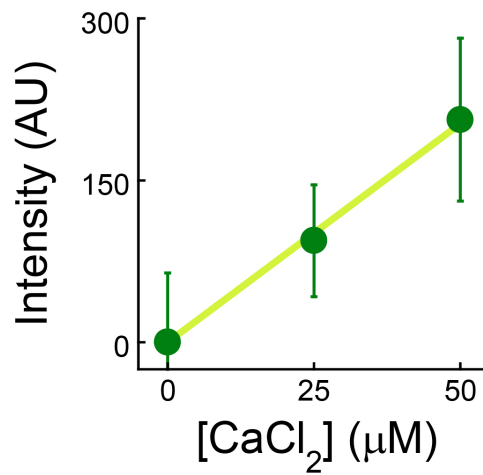

**Supplementary Fig. S2 Fluorescent intensity of Fluo 3 against Ca<sup>2+</sup> concentration**

Dependence of fluorescent intensity of 50 μM Fluo 3 on Ca<sup>2+</sup> concentration. The data, measured using the micro-well with 5.0-μm diameter and 1.0-μm height, was fitted with the linear function (solid line).
